# Supplementary material
Source: HighWire-hosted journal article supplement (https://thorax.bmj.com/highwire/filestream/173983/field_highwire_adjunct_files/0/62121039webonlyapp.pdf)

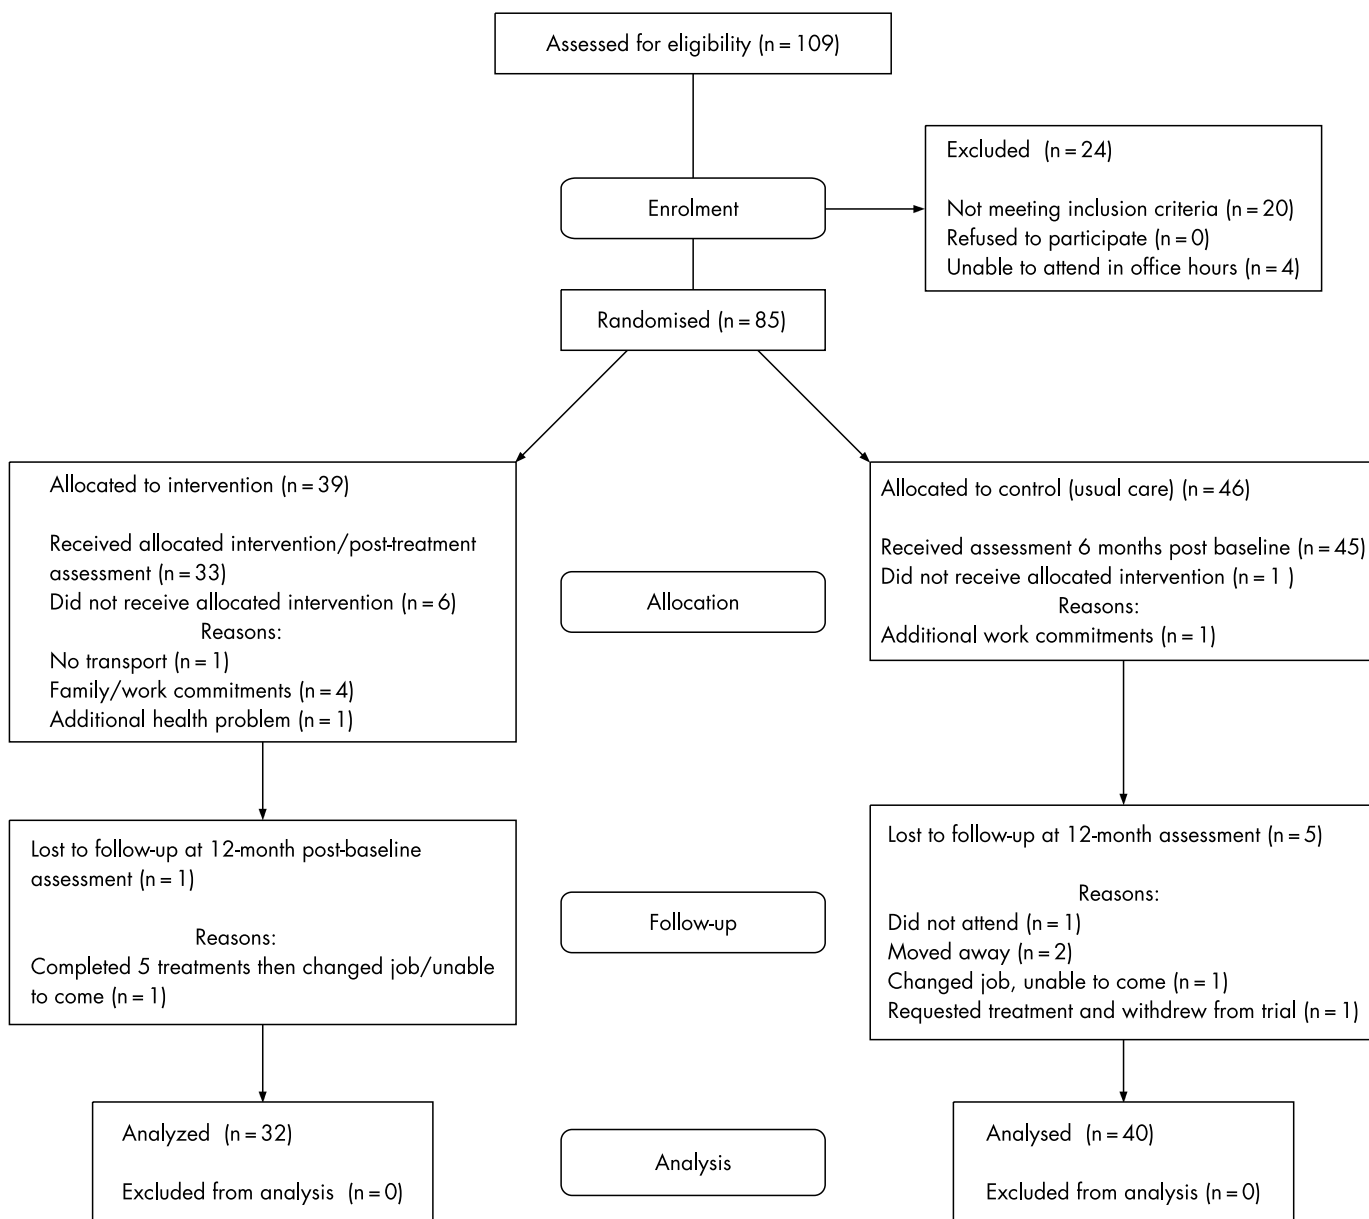

Supplement: 62121039webonlyapp.pdf [file 62121039webonlyapp.pdf]
